# Supplementary material for: Large language models in patient education: a scoping review of applications in medicine
Source: Front Med (Lausanne). 2024 Oct 29;11:1477898. doi: 10.3389/fmed.2024.1477898 (PMC11554522; doi:10.3389/fmed.2024.1477898)
Supplement: Supplementary file 1 [file Data_Sheet_1.XLSX]

## Sheet: Supplementary Table 1
Author - Year	Country	Title	Journal Name Abbreviation	Utilized Large Language Model	Medical Speciality
Abreu et al. - 2024	United States	Enhancing Readability of Online Patient-Facing Content: The Role of AI Chatbots in Improving Cancer Information Accessibility.	J Natl Compr Canc Netw	ChatGPT 4.0	Oncology
Al-Sharif et al. - 2024	United States	Evaluating the Accuracy of ChatGPT and Google BARD in Fielding Oculoplastic Patient Queries: A Comparative Study on Artificial versus Human Intelligence.	Ophthalmic Plast Reconstr Surg	ChatGPT 3.5 and Google BARD	Ophtalmology
Alanezi et al. - 2024	Saudi Arabia	Examining the role of ChatGPT in promoting health behaviors and lifestyle changes among cancer patients.	Nutr Health	ChatGPT 3.5	Oncology
Alapati et al. - 2024	United States	Evaluating insomnia queries from an artificial intelligence chatbot for patient education.	J Clin Sleep Med	ChatGPT 3.5	General Medicine
Alessandri-Bonetti et al. - 2023	United States	Online patient education in body contouring: A comparison between Google and ChatGPT.	J Plast Reconstr Aesthet Surg	ChatGPT 3.5	Plastic Surgery
Ali et al. - 2024	United States	Bridging the literacy gap for surgical consents: an AI-human expert collaborative approach.	NPJ Digit Med	ChatGPT 4.0	Neurological Surgery
Aliyeva et al. - 2024	United States	Enhancing Postoperative Cochlear Implant Care With ChatGPT-4: A Study on Artificial Intelligence (AI)-Assisted Patient Education and Support.	Cureus	ChatGPT 4.0	Otolaryngology
Almagazzachi et al. - 2024	United States	Generative Artificial Intelligence in Patient Education: ChatGPT Takes on Hypertension Questions.	Cureus	ChatGPT	Cardiology
Altamimi et al. - 2023	Saudi Arabia	Snakebite Advice and Counseling From Artificial Intelligence: An Acute Venomous Snakebite Consultation With ChatGPT.	Cureus	ChatGPT 3.5	Emergency Medicine
Amaral et al. - 2024	United States	Evaluating Chat Generative Pre-trained Transformer Responses to Common Pediatric In-toeing Questions.	J Pediatr Orthop	ChatGPT 3.5	Pediatrics
Amin et al. - 2024	United States	Assessing the Efficacy of Large Language Models in Health Literacy: A Comprehensive Cross-Sectional Study.	Yale J Biol Med	ChatGPT 3.5, ChatGPT 4.0, Microsoft Bing Chat, and Google BARD	General Medicine
An et al. - 2024	China	Enhancing patient education in cancer care: Intelligent cancer patient education model for effective communication.	Comput Biol Med	Chatbot based on ChatGPT	Oncology
Anastasio et al. - 2023	United States	Evaluating the Quality and Usability of Artificial Intelligence-Generated Responses to Common Patient Questions in Foot and Ankle Surgery.	Foot Ankle Orthop	ChatGPT	Orthopedic Surgery
Atarere et al. - 2024	United States	Applicability of Online Chat-Based Artificial Intelligence Models to Colorectal Cancer Screening.	Dig Dis Sci	ChatGPT, Microsoft Bing Chat, and YouChat™	Gastroenterology/Hepatology
Athavale et al. - 2023	United States	The potential of chatbots in chronic venous disease patient management.	JVS Vasc Insights	ChatGPT 3.5 and ChatGPT 4.0	Vascular Surgery
Ayers et al. - 2023	United States	Comparing Physician and Artificial Intelligence Chatbot Responses to Patient Questions Posted to a Public Social Media Forum.	JAMA Intern Med	ChatGPT 3.5	Infectious Disease
Ayoub et al. - 2023	United States	Comparison Between ChatGPT and Google Search as Sources of Postoperative Patient Instructions.	JAMA Otolaryngol Head Neck Surg	ChatGPT	Otolaryngology
Ayoub et al. - 2024	United States	Head-to-Head Comparison of ChatGPT Versus Google Search for Medical Knowledge Acquisition.	Otolaryngol Head Neck Surg	ChatGPT	Otolaryngology
Ayre et al. - 2024	Australia	New Frontiers in Health Literacy: Using ChatGPT to Simplify Health Information for People in the Community.	J Gen Intern Med	ChatGPT 3.5	General Medicine
Bains et al. - 2024	United States	Use and Application of Large Language Models for Patient Questions Following Total Knee Arthroplasty.	J Arthroplasty	ChatGPT 3.5	Orthopedic Surgery
Baldwin et al. - 2024	United Kingdom	An artificial intelligence language model improves readability of burns first aid information.	Burns	ChatGPT 3.0	Plastic Surgery
Balel et al. - 2023	Turkey	Can ChatGPT be used in oral and maxillofacial surgery?	J Stomatol Oral Maxillofac Surg	ChatGPT	Dentistry
Bellinger et al. - 2024	United States	BPPV Information on Google Versus AI (ChatGPT).	Otolaryngol Head Neck Surg	ChatGPT	Otolaryngology
Bernstein et al. - 2023	United States	Comparison of Ophthalmologist and Large Language Model Chatbot Responses to Online Patient Eye Care Questions.	JAMA Netw Open	ChatGPT 3.5	Ophtalmology
Borna et al. - 2024	United States	Comparative Analysis of Artificial Intelligence Virtual Assistant and Large Language Models in Post-Operative Care.	Eur J Investig Health Psychol Educ	ChatGPT 4.0, Google BARD, and Chatbot	Plastic Surgery
Bragazzi et al. - 2024	Italy	Assessing the Accuracy of Generative Conversational Artificial Intelligence in Debunking Sleep Health Myths: Mixed Methods Comparative Study With Expert Analysis.	JMIR Form Res	ChatGPT 4.0	General Medicine
Breneman et al. - 2024	United States	Evaluation of large language model responses to Mohs surgery preoperative questions.	Arch Dermatol Res	ChatGPT 3.5, ChatGPT 4.0, Microsoft Copilot, and Google BARD	Dermatology
Browne et al. - 2024	Ireland	ChatGPT-4 Can Help Hand Surgeons Communicate Better With Patients.	J Hand Surg Glob Online	ChatGPT 4.0	Plastic Surgery
Brozović et al. - 2024	Croatia	Assessing the performance of Bing Chat artificial intelligence: Dental exams, clinical guidelines, and patients' frequent questions.	J Dent	Microsoft Bing Chat	Dentistry
Bulck et al. - 2024	Belgium	What if your patient switches from Dr. Google to Dr. ChatGPT? A vignette-based survey of the trustworthiness, value, and danger of ChatGPT-generated responses to health questions.	Eur J Cardiovasc Nurs	ChatGPT 3.0	Cardiology
Caglar et al. - 2024	Turkey	Evaluating the performance of ChatGPT in answering questions related to pediatric urology.	J Pediatr Urol	ChatGPT	Pediatrics
Campbell et al. - 2023	United States	Evaluating ChatGPT responses on obstructive sleep apnea for patient education.	J Clin Sleep Med	ChatGPT 3.5	Otolaryngology
Campbell et al. - 2024	United States	Evaluating ChatGPT Responses on Thyroid Nodules for Patient Education.	Thyroid	ChatGPT 3.5 and ChatGPT 4.0	Otolaryngology
Capelleras et al. - 2024	Turkey	ChatGPT and Rhinoplasty Recovery: An Exploration of AI's Role in Postoperative Guidance.	Facial Plast Surg	ChatGPT	Otolaryngology
Cappellani et al. - 2024	United States	Reliability and accuracy of artificial intelligence ChatGPT in providing information on ophthalmic diseases and management to patients.	Eye (Lond)	ChatGPT 3.5	Ophtalmology
Carnino et al. - 2024	United States	Assessing ChatGPT's Responses to Otolaryngology Patient Questions.	Ann Otol Rhinol Laryngol	ChatGPT 3.5	Otolaryngology
Chaker et al. - 2024	United States	Easing the Burden on Caregivers- Applications of Artificial Intelligence for Physicians and Caregivers of Children with Cleft Lip and Palate.	Cleft Palate Craniofac J	ChatGPT 3.5	Plastic Surgery
Chen et al. - 2024	China	ICGA-GPT: report generation and question answering for indocyanine green angiography images.	Br J Ophthalmol	Chatbot based on Llama 2	Ophtalmology
Chen et al. - 2024	Canada	Physician and Artificial Intelligence Chatbot Responses to Cancer Questions From Social Media.	JAMA Oncol	ChatGPT 3.5, ChatGPT 4.0 and Claude AI	Oncology
Cheong et al. - 2024	United Kingdom	Artificial intelligence chatbots as sources of patient education material for obstructive sleep apnoea: ChatGPT versus Google Bard.	Eur Arch Otorhinolaryngol	ChatGPT 3.5 and Google BARD	Otolaryngology
Cheong et al. - 2024	Singapore	Comparing generative and retrieval-based chatbots in answering patient questions regarding age-related macular degeneration and diabetic retinopathy.	Br J Ophthalmol	ChatGPT 3.5, ChatGPT 4.0,Google BARD and Chatbot	Ophtalmology
Chervonski et al. - 2024	United States	Generative artificial intelligence chatbots may provide appropriate informational responses to common vascular surgery questions by patients.	Vascular	ChatGPT 3.5 and Google BARD	Vascular Surgery
Christy et al. - 2024	United States	Appropriateness and Reliability of an Online Artificial Intelligence Platform's Responses to Common Questions Regarding Distal Radius Fractures.	J Hand Surg Am	ChatGPT 3.5	Orthopedic Surgery
Cohen et al. - 2024	United States	Dr. Google vs. Dr. ChatGPT: Exploring the Use of Artificial Intelligence in Ophthalmology by Comparing the Accuracy, Safety, and Readability of Responses to Frequently Asked Patient Questions Regarding Cataracts and Cataract Surgery.	Semin Ophthalmol	ChatGPT 3.5	Ophtalmology
Connors et al. - 2024	United States	Evaluation of the Current Status of Artificial Intelligence for Endourology Patient Education: A Blind Comparison of ChatGPT and Google Bard Against Traditional Information Resources.	J Endourol	ChatGPT 4.0 and Google BARD	Urology
Cornelison et al. - 2024	United States	Accuracy of a Chatbot in Answering Questions that Patients Should Ask Before Taking a New Medication.	J Am Pharm Assoc (2003)	ChatGPT 3.5	Pharmacology
Covington et al. - 2024	United States	Unlocking the future of patient Education: ChatGPT vs. LexiComp® as sources of patient education materials.	J Am Pharm Assoc (2003)	ChatGPT	General Medicine
Croen et al. - 2024	United States	Evaluation of Patient Education Materials From Large-Language Artificial Intelligence Models on Carpal Tunnel Release.	Hand (N Y)	ChatGPT 3.5	Orthopedic Surgery
Crook et al. - 2023	United States	Evaluation of Online Artificial Intelligence-Generated Information on Common Hand Procedures.	J Hand Surg Am	ChatGPT 3.0	Orthopedic Surgery
Cung et al. - 2024	United States	The performance of artificial intelligence chatbot large language models to address skeletal biology and bone health queries.	J Bone Miner Res	ChatGPT 4.0, Google BARD and Microsoft Bing Chat	General Medicine
Davis et al. - 2023	United States	Evaluating the Effectiveness of Artificial Intelligence-powered Large Language Models Application in Disseminating Appropriate and Readable Health Information in Urology.	J Urol	ChatGPT 3.5	Urology
Dhar et al. - 2024	United States	The utility and accuracy of ChatGPT in providing post-operative instructions following tonsillectomy: A pilot study.	Int J Pediatr Otorhinolaryngol	ChatGPT 3.5	Pediatrics
Dihan et al. - 2024	United States	Using Large Language Models to Generate Educational Materials on Childhood Glaucoma.	Am J Ophthalmol	ChatGPT 3.5, ChatGPT 4.0 and Google BARD	Pediatrics
Dimitriadis et al. - 2024	Greece	ChatGPT and Patients With Heart Failure.	Angiology	ChatGPT 3.5	Cardiology
Doğan et al. - 2024	Turkey	The Performance of Chatbots and the AAPOS Website as a Tool for Amblyopia Education.	J Pediatr Ophthalmol Strabismus	ChatGPT 3.5, Google BARD and Microsoft Bing Chat	Ophtalmology
Dubin et al. - 2024	United States	Appropriateness of Frequently Asked Patient Questions Following Total Hip Arthroplasty From ChatGPT Compared to Arthroplasty-Trained Nurses.	J Arthroplasty	ChatGPT 3.5	Orthopedic Surgery
Durairaj et al. - 2023	United States	Artificial Intelligence Versus Expert Plastic Surgeon: Comparative Study Shows ChatGPT "Wins" Rhinoplasty Consultations: Should We Be Worried?	Facial Plast Surg Aesthet Med	ChatGPT 3.5	Plastic Surgery
Eid et al. - 2024	United States	Optimizing Ophthalmology Patient Education via ChatBot-Generated Materials: Readability Analysis of AI-Generated Patient Education Materials and The American Society of Ophthalmic Plastic and Reconstructive Surgery Patient Brochures.	Ophthalmic Plast Reconstr Surg	ChatGPT 4.0, Google BARD	Ophtalmology
Eppler et al. - 2023	United States	Bridging the Gap Between Urological Research and Patient Understanding: The Role of Large Language Models in Automated Generation of Layperson's Summaries.	Urol Pract	ChatGPT 3.5	Urology
Fahy et al. - 2024	Germany	Assessment of the Quality and Readability of Information Provided by ChatGPT in Relation to the Use of Platelet-Rich Plasma Therapy for Osteoarthritis.	J Pers Med	ChatGPT 3.5 and ChatGPT 4.0	Orthopedic Surgery
Fahy et al. - 2024	Germany	Assessment of Quality and Readability of Information Provided by ChatGPT in Relation to Anterior Cruciate Ligament Injury.	J Pers Med	ChatGPT 3.5 and ChatGPT 4.0	Orthopedic Surgery
Fanning et al. - 2024	United States	Improving Readability and Automating Content Analysis of Plastic Surgery Webpages With ChatGPT.	J Surg Res	ChatGPT 3.5 and ChatGPT 4.0	Plastic Surgery
Gabriel et al. - 2023	United Kingdom	The utility of the ChatGPT artificial intelligence tool for patient education and enquiry in robotic radical prostatectomy.	Int Urol Nephrol	ChatGPT 3.5	Urology
Gajjar et al. - 2024	United States	Usefulness and Accuracy of Artificial Intelligence Chatbot Responses to Patient Questions for Neurosurgical Procedures.	Neurosurgery	ChatGPT 3.0, ChatGPT 3.5 and ChatGPT 4.0	Neurological Surgery
Garbarino et al. - 2024	Italy	Evaluating the effectiveness of artificial intelligence-based tools in detecting and understanding sleep health misinformation: Comparative analysis using Google Bard and OpenAI ChatGPT-4.	J Sleep Res	ChatGPT 4.0 and Google BARD	General Medicine
Garcia et al. - 2024	United States	Empowering inclusivity: improving readability of living kidney donation information with ChatGPT.	Front Digit Health	ChatGPT 3.5 and ChatGPT 4.0	Nephrology
Ghanem et al. - 2024	United States	Educating patients on osteoporosis and bone health: Can "ChatGPT" provide high-quality content?	Eur J Orthop Surg Traumatol	ChatGPT 3.5	General Medicine
Ghanem et al. - 2024	United States	Dr. Google to Dr. ChatGPT: assessing the content and quality of artificial intelligence-generated medical information on appendicitis.	Surg Endosc	ChatGPT 3.5, ChatGPT 4.0, Claude AI and Google BARD	General Medicine
Gordon et al. - 2024	United States	Enhancing Patient Communication With Chat-GPT in Radiology: Evaluating the Efficacy and Readability of Answers to Common Imaging-Related Questions.	J Am Coll Radiol	ChatGPT 3.5	Radiology
Gray et al. - 2024	United States	Increasing Realism and Variety of Virtual Patient Dialogues for Prenatal Counseling Education Through a Novel Application of ChatGPT: Exploratory Observational Study.	JMIR Med Educ	ChatGPT 3.5	Neonatology
Grimm et al. - 2024	United States	The utility of ChatGPT as a generative medical translator.	Eur Arch Otorhinolaryngol	ChatGPT 4.0	General Medicine
Gül et al. - 2024	Turkey	How artificial intelligence can provide information about subdural hematoma: Assessment of readability, reliability, and quality of ChatGPT, BARD, and perplexity responses.	Medicine (Baltimore)	ChatGPT, Google BARD and Perplexity	Neurological Surgery
Günay et al. - 2024	Turkey	AI in patient education: Assessing the impact of ChatGPT-4 on conveying comprehensive information about chest pain.	Am J Emerg Med	ChatGPT 4.0	Emergency Medicine
Haidar et al. - 2023	United Kingdom	AI-Generated Information for Vascular Patients: Assessing the Standard of Procedure-Specific Information Provided by the ChatGPT AI-Language Model.	Cureus	ChatGPT 3.5	Vascular Surgery
Halawani et al. - 2024	Saudi Arabia	Accuracy and Readability of Kidney Stone Patient Information Materials Generated by a Large Language Model Compared to Official Urologic Organizations.	Urology	ChatGPT 3.5 and ChatGPT 4.0	Urology
He et al. - 2024	United States	Quality of Answers of Generative Large Language Models Versus Peer Users for Interpreting Laboratory Test Results for Lay Patients: Evaluation Study.	J Med Internet Res	ChatGPT 4.0,ChatGPT 3.5, LLaMA 2, MedAlpaca, and ORCA_mini	General Medicine
Hernandez et al. - 2023	Barbados	The Future of Patient Education: AI-Driven Guide for Type 2 Diabetes.	Cureus	ChatGPT 3.5	Endocrinology
Hershenhouse et al. - 2024	United States	Accuracy, readability, and understandability of large language models for prostate cancer information to the public.	Prostate Cancer Prostatic Dis	ChatGPT 3.5	Oncology
Hillmann et al. - 2023	Germany	Accuracy and comprehensibility of chat-based artificial intelligence for patient information on atrial fibrillation and cardiac implantable electronic devices.	Europace	Google BARD, Microsoft Bing Chat and ChatGPT 4	Cardiology
Hirpara et al. - 2024	United States	Does the Internet Provide Quality Information on Metoidioplasty? Using the Modified Ensuring Quality Information for Patients Tool to Evaluate Artificial Intelligence-Generated and Online Information on Metoidioplasty.	Ann Plast Surg	ChatGPT	Plastic Surgery
Høj et al. - 2024	Denmark	Artificial intelligence and allergic rhinitis: does ChatGPT increase or impair the knowledge?	J Public Health (Oxf)	ChatGPT	Allergy and Immunology
Hristidis et al. - 2023	United States	ChatGPT vs Google for Queries Related to Dementia and Other Cognitive Decline: Comparison of Results.	J Med Internet Res	ChatGPT	Neurology
Hung et al. - 2023	United States	Comparison of Patient Education Materials Generated by Chat Generative Pre-Trained Transformer Versus Experts: An Innovative Way to Increase Readability of Patient Education Materials.	Ann Plast Surg	ChatGPT 3.5	Plastic Surgery
Ibrahim et al. - 2024	Pakistan	Language-adaptive artificial intelligence: assessing CHATGPT'S answer to frequently asked questions on total hip arthroplasty questions.	J Pak Med Assoc	ChatGPT 3.5	Orthopedic Surgery
Jazi et al. - 2023	Iran	Bariatric Evaluation Through AI: a Survey of Expert Opinions Versus ChatGPT-4 (BETA-SEOV).	Obes Surg	ChatGPT 4.0	General Surgery
Johns et al. - 2024	United States	ChatGPT Can Offer Satisfactory Responses to Common Patient Questions Regarding Elbow Ulnar Collateral Ligament Reconstruction.	Arthrosc Sports Med Rehabil	ChatGPT 3.5	Orthopedic Surgery
Johnson et al. - 2024	United States	Evaluation of ChatGPT for Pelvic Floor Surgery Counseling.	Urogynecology (Phila)	ChatGPT 3.0	Obstetrics & Gynecology
Juhi et al. - 2023	India	The Capability of ChatGPT in Predicting and Explaining Common Drug-Drug Interactions.	Cureus	ChatGPT	Pharmacology
Kasthuri et al. - 2024	United States	Assessing the Accuracy and Reliability of AI-Generated Responses to Patient Questions Regarding Spine Surgery.	J Bone Joint Surg Am	Microsoft Bing Chat	Orthopedic Surgery
Kienzle et al. - 2024	Germany	ChatGPT May Offer an Adequate Substitute for Informed Consent to Patients Prior to Total Knee Arthroplasty-Yet Caution Is Needed.	J Pers Med	ChatGPT 4.0	Orthopedic Surgery
Kim et al. - 2024	United States	Chatbot Performance in Defining and Differentiating Palliative Care, Supportive Care, Hospice Care.	J Pain Symptom Manage	ChatGPT 3.5, Google BARD and Microsoft Bing Chat	Palliative Care
King et al. - 2024	United States	Appropriateness of ChatGPT in Answering Heart Failure Related Questions.	Heart Lung Circ	ChatGPT 3.5 and ChatGPT 4.0	Cardiology
King et al. - 2024	United States	A Multidisciplinary Assessment of ChatGPT's Knowledge of Amyloidosis: Observational Study.	JMIR Cardio	ChatGPT 3.5 and ChatGPT 4.0	Cardiology
Kirchner et al. - 2023	United States	Can Artificial Intelligence Improve the Readability of Patient Education Materials?	Clin Orthop Relat Res	ChatGPT	General Medicine
Köroğlu et al. - 2023	Turkey	A Novel Approach: Evaluating ChatGPT's Utility for the Management of Thyroid Nodules.	Cureus	ChatGPT	Endocrinology
Kozaily et al. - 2024	United States	Accuracy and consistency of online large language model-based artificial intelligence chat platforms in answering patients' questions about heart failure.	Int J Cardiol	ChatGPT 3.5	Cardiology
Kuckelman et al. - 2024	United States	Assessing AI-Powered Patient Education: A Case Study in Radiology.	Acad Radiol	ChatGPT 3.5	Radiology
Kuckelman et al. - 2024	United States	Translating musculoskeletal radiology reports into patient-friendly summaries using ChatGPT-4.	Skeletal Radiol	ChatGPT 4.0	Radiology
Kuşcu et al. - 2023	Turkey	Is ChatGPT accurate and reliable in answering questions regarding head and neck cancer?	Front Oncol	ChatGPT 4.0	Otolaryngology
Lambert et al. - 2024	United States	Assessing the Application of Large Language Models in Generating Dermatologic Patient Education Materials According to Reading Level: Qualitative Study.	JMIR Dermatol	ChatGPT 3.5, GPT 4, DermGPT and and DocsGPT	Dermatology
Lang et al. - 2024	Germany	Are large language models valid tools for patient information on lumbar disc herniation? The spine surgeons' perspective.	Brain Spine	ChatGPT 4.0	Neurological Surgery
Lechien et al. - 2024	France	ChatGPT-4 accuracy for patient education in laryngopharyngeal reflux.	Eur Arch Otorhinolaryngol	ChatGPT 4.0	Otolaryngology
Lee et al. - 2024	United States	Exploring the Role of Artificial Intelligence Chatbots in Preoperative Counseling for Head and Neck Cancer Surgery.	Laryngoscope	ChatGPT	Otolaryngology
Lee et al. - 2024	United States	Evaluating ChatGPT-3.5 and ChatGPT-4.0 Responses on Hyperlipidemia for Patient Education.	Cureus	ChatGPT 3.5 and ChatGPT 4.0	Cardiology
Lee et al. - 2024	United States	Unlocking Health Literacy: The Ultimate Guide to Hypertension Education From ChatGPT Versus Google Gemini.	Cureus	ChatGPT 3.5 and Google Gemini	Cardiology
Li et al. - 2024	China	Benchmarking State-of-the-Art Large Language Models for Migraine Patient Education: A Comparison of Performances on the Responses to Common Queries.	J Med Internet Res	ChatGPT 3.5, ChatGPT 4.0, Google BARD, Meta Llama2, and Claude 2	Neurology
Li et al. - 2024	China	Exploring the Potential of ChatGPT-4 in Responding to Common Questions About Abdominoplasty: An AI-Based Case Study of a Plastic Surgery Consultation.	Aesthetic Plast Surg	ChatGPT 4.0	Plastic Surgery
Lim et al. - 2023	Australia	Using Generative Artificial Intelligence Tools in Cosmetic Surgery: A Study on Rhinoplasty, Facelifts, and Blepharoplasty Procedures.	J Clin Med	ChatGPT 4.0 and Google BARD	Plastic Surgery
Liu et al. - 2024	United States	Consulting the Digital Doctor: Google Versus ChatGPT as Sources of Information on Breast Implant-Associated Anaplastic Large Cell Lymphoma and Breast Implant Illness.	Aesthetic Plast Surg	ChatGPT 3.5	Oncology
Liu et al. - 2024	United States	Leveraging large language models for generating responses to patient messages-a subjective analysis.	J Am Med Inform Assoc	ChatGPT 4.0	General Medicine
Lv et al. - 2024	China	Leveraging Large Language Models for Improved Patient Access and Self-Management: Assessor-Blinded Comparison Between Expert- and AI-Generated Content.	J Med Internet Res	ChatGPT 3.5, ChatGPT 4.0 and Google BARD	Dentistry
Lyu et al. - 2023	United States	Translating radiology reports into plain language using ChatGPT and GPT-4 with prompt learning: results, limitations, and potential.	Vis Comput Ind Biomed Art	ChatGPT 3.0 and ChatGPT 4	Radiology
Mashatian et al. - 2024	United States	Building Trustworthy Generative Artificial Intelligence for Diabetes Care and Limb Preservation: A Medical Knowledge Extraction Case.	J Diabetes Sci Technol	ChatGPT 4.0	Endocrinology
Mastrokostas et al. - 2024	United States	GPT-4 as a Source of Patient Information for Anterior Cervical Discectomy and Fusion: A Comparative Analysis Against Google Web Search.	Global Spine J	ChatGPT 4.0	Orthopedic Surgery
McCarthy et al. - 2023	United States	Evaluation of an Artificial Intelligence Chatbot for Delivery of IR Patient Education Material: A Comparison with Societal Website Content.	J Vasc Interv Radiol	ChatGPT	Interventional Radiology
McMahon et al. - 2024	United States	Automating untruths: ChatGPT, self-managed medication abortion, and the threat of misinformation in a post-Roe world.	Front Digit Health	ChatGPT 3.5	Obstetrics & Gynecology
Meyer et al. - 2024	United States	ChatGPT compared with Google Search and healthcare institution as sources of postoperative patient instructions after gynecological surgery.	BJOG	ChatGPT 3.5	Obstetrics & Gynecology
Meyer et al. - 2024	Germany	Comparison of ChatGPT, Gemini, and Le Chat with physician interpretations of medical laboratory questions from an online health forum.	Clin Chem Lab Med	ChatGPT 4.0, Gemini Pro, and Le Chat [Mistral Large]	General Medicine
Mika et al. - 2023	United States	Assessing ChatGPT Responses to Common Patient Questions Regarding Total Hip Arthroplasty.	J Bone Joint Surg Am	ChatGPT	Orthopedic Surgery
Mika et al. - 2024	United States	Can ChatGPT Answer Patient Questions Regarding Total Knee Arthroplasty?	J Knee Surg	ChatGPT	Orthopedic Surgery
Minutolo et al. - 2022	Italy	A conversational agent for querying Italian Patient Information Leaflets and improving health literacy.	Comput Biol Med	Chatbot based on BERT	General Medicine
Mishra et al. - 2024	United States	Evaluation of Prompts to Simplify Cardiovascular Disease Information Generated Using a Large Language Model: Cross-Sectional Study.	J Med Internet Res	ChatGPT 4.0	Cardiology
Moazzam et al. - 2023	United States	A Paradigm Shift: Online Artificial Intelligence Platforms as an Informational Resource in Bariatric Surgery.	Obes Surg	ChatGPT	General Surgery
Moise et al. - 2023	Canada	Can ChatGPT Guide Parents on Tympanostomy Tube Insertion?	Children (Basel)	ChatGPT 3.5	Otolaryngology
Mondal et al. - 2023	India	Using ChatGPT for Writing Articles for Patients' Education for Dermatological Diseases: A Pilot Study.	Indian Dermatol Online J	ChatGPT	Dermatology
Mondal et al. - 2023	India	A pilot study on the capability of artificial intelligence in preparation of patients' educational materials for Indian public health issues.	J Family Med Prim Care	ChatGPT	General Medicine
Mondal et al. - 2023	India	ChatGPT in Answering Queries Related to Lifestyle-Related Diseases and Disorders.	Cureus	ChatGPT 3.5	General Medicine
Monroe et al. - 2024	United States	Evaluation of responses to cardiac imaging questions by the artificial intelligence large language model ChatGPT.	Clin Imaging	ChatGPT 3.5	Cardiology
Moons et al. - 2024	Belgium	Using ChatGPT and Google Bard to improve the readability of written patient information: a proof of concept.	Eur J Cardiovasc Nurs	ChatGPT and Google BARD	General Medicine
Mootz et al. - 2024	United States	The Accuracy of ChatGPT-Generated Responses in Answering Commonly Asked Patient Questions About Labor Epidurals: A Survey-Based Study.	Anesth Analg	ChatGPT 3.5	Obstetrics & Gynecology
Munir et al. - 2024	United States	Online artificial intelligence platforms and their applicability to gastrointestinal surgical operations.	J Gastrointest Surg	ChatGPT 4.0	General Surgery
Musheyev et al. - 2024	United States	How Well Do Artificial Intelligence Chatbots Respond to the Top Search Queries About Urological Malignancies?	Eur Urol	ChatGPT, Perplexity, Chat Sonic, and Microsoft Bing Chat	Urology
Nanji et al. - 2024	United States	Evaluation of postoperative ophthalmology patient instructions from ChatGPT and Google Search.	Can J Ophthalmol	ChatGPT 3.5	Ophtalmology
Nov et al. - 2023	United States	Putting ChatGPT's Medical Advice to the (Turing) Test: Survey Study.	JMIR Med Educ	ChatGPT 3.5	General Medicine
O'Hagan et al. - 2023	United States	Trends in Accuracy and Appropriateness of Alopecia Areata Information Obtained from a Popular Online Large Language Model, ChatGPT.	Dermatology	ChatGPT 3.0 and ChatGPT 4	Dermatology
Ocakoğlu et al. - 2024	Turkey	The Emerging Role of AI in Patient Education: A Comparative Analysis of LLM Accuracy for Pelvic Organ Prolapse.	Med Princ Pract	ChatGPT 4.0, Google BARD and Microsoft Bing Chat	Obstetrics & Gynecology
Ostrowska et al. - 2024	Poland	To trust or not to trust: evaluating the reliability and safety of AI responses to laryngeal cancer queries.	Eur Arch Otorhinolaryngol	ChatGPT 3.5, ChatGPT 4.0, and Google BARD	Otolaryngology
Pan et al. - 2023	United States	Assessment of Artificial Intelligence Chatbot Responses to Top Searched Queries About Cancer.	JAMA Oncol	ChatGPT 3.5 , Perplexity, Chatsonic and Microsoft Bing Chat	Oncology
Parekh et al. - 2024	United States	Foot and Ankle Patient Education Materials and Artificial Intelligence Chatbots: A Comparative Analysis.	Foot Ankle Spec	ChatGPT 3.0, Microsoft Bing Chat, and Google BARD	Orthopedic Surgery
Patel et al. - 2024	United States	The Use of Artificial Intelligence to Improve Readability of Otolaryngology Patient Education Materials.	Otolaryngol Head Neck Surg	ChatGPT 4.0	Otolaryngology
Patil et al. - 2024	Canada	THE ABILITY OF ARTIFICIAL INTELLIGENCE CHATBOTS ChatGPT AND GOOGLE BARD TO ACCURATELY CONVEY PREOPERATIVE INFORMATION FOR PATIENTS UNDERGOING OPHTHALMIC SURGERIES.	Retina	ChatGPT 4.0, Google Bard	Ophtalmology
Peng et al. - 2024	China	Evaluating AI in medicine: a comparative analysis of expert and ChatGPT responses to colorectal cancer questions.	Sci Rep	ChatGPT 3.5	Oncology
Pohl et al. - 2024	United States	A quality and readability comparison of artificial intelligence and popular health website education materials for common hand surgery procedures.	Hand Surg Rehabil	ChatGPT 3.5	Orthopedic Surgery
Ponzo et al. - 2024	Italy	Is ChatGPT an Effective Tool for Providing Dietary Advice?	Nutrients	ChatGPT 3.5	General Medicine
Potapenko et al. - 2023	Denmark	Artificial Intelligence-Based ChatGPT Responses for Patient Questions on Optic Disc Drusen.	Ophthalmol Ther	ChatGPT 4.0	Ophtalmology
Pradhan et al. - 2024	United States	Artificial intelligence compared with human-derived patient educational materials on cirrhosis.	Hepatol Commun	ChatGPT, DocsGPT, Google BARD, and Microsoft Bing Chat	Gastroenterology/Hepatology
Razdan et al. - 2023	United States	Assessing ChatGPT's ability to answer questions pertaining to erectile dysfunction: can our patients trust it?	Int J Impot Res	ChatGPT 3.5	Urology
Reichenpfader et al. - 2024	Switzerland	Large Language Model-Based Evaluation of Medical Question Answering Systems: Algorithm Development and Case Study.	Stud Health Technol Inform	ChatGPT 4.0	General Medicine
Roberts et al. - 2024	United Kingdom	Can Large Language Models Generate Outpatient Clinic Letters at First Consultation That Incorporate Complication Profiles From UK and USA Aesthetic Plastic Surgery Associations?	Aesthet Surg J Open Forum	ChatGPT 3.5, ChatGPT 4.0, and Google BARD	Plastic Surgery
Rogasch et al. - 2023	Germany	ChatGPT: Can You Prepare My Patients for [(18)F]FDG PET/CT and Explain My Reports?	J Nucl Med	ChatGPT 4.0	Radiology
Roster et al. - 2024	United States	Readability and Health Literacy Scores for ChatGPT-Generated Dermatology Public Education Materials: Cross-Sectional Analysis of Sunscreen and Melanoma Questions.	JMIR Dermatol	ChatGPT 3.5	Dermatology
Rouhi et al. - 2024	United States	Can Artificial Intelligence Improve the Readability of Patient Education Materials on Aortic Stenosis? A Pilot Study.	Cardiol Ther	ChatGPT 3.5	Cardiovascular Surgery
Samaan et al. - 2023	United States	Assessing the Accuracy of Responses by the Language Model ChatGPT to Questions Regarding Bariatric Surgery.	Obes Surg	ChatGPT	Gastroenterology/Hepatology
Şan et al. - 2024	Turkey	Reliability and readability analysis of GPT-4 and google bard as a patient information source for the most commonly applied radionuclide treatments in cancer patients.	Rev Esp Med Nucl Imagen Mol (Engl Ed)	ChatGPT 4.0, and Google BARD	Nuclear Medicine
Sarangi et al. - 2023	India	Assessing ChatGPT's Proficiency in Simplifying Radiological Reports for Healthcare Professionals and Patients.	Cureus	ChatGPT 3.5	Radiology
Scheschenja et al. - 2024	Germany	Feasibility of GPT-3 and GPT-4 for in-Depth Patient Education Prior to Interventional Radiological Procedures: A Comparative Analysis.	Cardiovasc Intervent Radiol	ChatGPT 3.5 and ChatGPT 4.0	Radiology
Sciberras et al. - 2024	Malta	Accuracy of Information given by ChatGPT for patients with Inflammatory Bowel Disease in relation to ECCO Guidelines.	J Crohns Colitis	ChatGPT 3.5	Gastroenterology/Hepatology
Şenoymak et al. - 2024	Turkey	The Role of Artificial Intelligence in Endocrine Management: Assessing ChatGPT's Responses to Prolactinoma Queries.	J Pers Med	ChatGPT 3.5	Endocrinology
Seth et al. - 2023	Australia	Evaluating Chatbot Efficacy for Answering Frequently Asked Questions in Plastic Surgery: A ChatGPT Case Study Focused on Breast Augmentation.	Aesthet Surg J	ChatGPT 4.0	Plastic Surgery
Shah et al. - 2024	United States	Comparison of ChatGPT and Traditional Patient Education Materials for Men's Health.	Urol Pract	ChatGPT 3.5	Urology
Shao et al. - 2023	China	Appropriateness and Comprehensiveness of Using ChatGPT for Perioperative Patient Education in Thoracic Surgery in Different Language Contexts: Survey Study.	Interact J Med Res	ChatGPT	Thoracic Surgery
Shen et al. - 2024	United States	ChatGPT vs. web search for patient questions: what does ChatGPT do better?	Eur Arch Otorhinolaryngol	ChatGPT 3.5	Otolaryngology
Shiraishi et al. - 2024	Japan	Appropriateness of Artificial Intelligence Chatbots in Diabetic Foot Ulcer Management.	Int J Low Extrem Wounds	ChatGPT, ChatGPT 4, ChatGPT 4 Turbo, Google BARD,Microsoft Bing Chat, Perplexity, Claude 2	Plastic Surgery
Shiraishi et al. - 2024	Japan	Generating Informed Consent Documents Related to Blepharoplasty Using ChatGPT.	Ophthalmic Plast Reconstr Surg	ChatGPT	Plastic Surgery
Song et al. - 2023	China	Evaluating the Performance of Different Large Language Models on Health Consultation and Patient Education in Urolithiasis.	J Med Syst	ChatGPT 4.0, Google BARD, Microsoft Bing Chat (NewBing), Claude AI	Urology
Spallek et al. - 2023	Australia	Can we use ChatGPT for Mental Health and Substance Use Education? Examining Its Quality and Potential Harms.	JMIR Med Educ	ChatGPT 4.0	Psychiatry
Sridharan et al. - 2024	Bahrain	Enhancing readability of USFDA patient communications through large language models: a proof-of-concept study.	Expert Rev Clin Pharmacol	ChatGPT 4.0 and Google Gemini	General Medicine
Srinivasan et al. - 2024	United States	Large language models and bariatric surgery patient education: a comparative readability analysis of GPT-3.5, GPT-4, Bard, and online institutional resources.	Surg Endosc	ChatGPT 4.0 ChatGPT 3.5 and Google BARD	General Surgery
Subramanian et al. - 2024	United States	Chat Generative Pretraining Transformer Answers Patient-focused Questions in Cervical Spine Surgery.	Clin Spine Surg	ChatGPT 3.5	Orthopedic Surgery
Sudharshan et al. - 2024	United States	Assessing the Utility of ChatGPT in Simplifying Text Complexity of Patient Educational Materials.	Cureus	ChatGPT 3.5	General Medicine
Tailor et al. - 2024	United States	A Comparative Study of Responses to Retina Questions from Either Experts, Expert-Edited Large Language Models, or Expert-Edited Large Language Models Alone.	Ophthalmol Sci	ChatGPT 3.5, ChatGPT 4, Claude 2, Microsoft Bing Chat, and Google BARD	Ophtalmology
Tailor et al. - 2024	United States	Appropriateness of Ophthalmology Recommendations From an Online Chat-Based Artificial Intelligence Model.	Mayo Clin Proc Digit Health	ChatGPT 4.0	Ophtalmology
Tao et al. - 2024	Canada	Utility of ChatGPT for Automated Creation of Patient Education Handouts: An Application in Neuro-Ophthalmology.	J Neuroophthalmol	ChatGPT 3.5	Ophtalmology
Taylor et al. - 2024	United States	An Artificial Intelligence Chatbot is an Accurate and Useful Online Patient Resource Prior to Total Knee Arthroplasty.	J Arthroplasty	ChatGPT	Orthopedic Surgery
Tepe et al. - 2024	United Arab Emirates	Decoding medical jargon: The use of AI language models (ChatGPT-4, BARD, microsoft copilot) in radiology reports.	Patient Educ Couns	ChatGPT 4, Microsoft Copilot and Google BARD	Radiology
Tepe et al. - 2024	United Arab Emirates	Assessing the Responses of Large Language Models (ChatGPT-4, Gemini, and Microsoft Copilot) to Frequently Asked Questions in Breast Imaging: A Study on Readability and Accuracy.	Cureus	ChatGPT 4, Microsoft Copilot and Google Gemini	Radiology
Tharakan et al. - 2024	United States	Do ChatGPT and Google differ in answers to commonly asked patient questions regarding total shoulder and total elbow arthroplasty?	J Shoulder Elbow Surg	ChatGPT 3.0	Orthopedic Surgery
Thia et al. - 2024	Australia	ChatGPT: Is This Patient Education Tool for Urological Malignancies Readable for the General Population?	Res Rep Urol	ChatGPT 3.5	Urology
Vallurupalli et al. - 2024	United States	Validation of ChatGPT 3.5 as a Tool to Optimize Readability of Patient-facing Craniofacial Education Materials.	Plast Reconstr Surg Glob Open	ChatGPT 3.5	Plastic Surgery
Washington et al. - 2024	United States	The Use of Chatbots in Head and Neck Mucosal Malignancy Treatment Recommendations.	Otolaryngol Head Neck Surg	ChatGPT 3.5	Otolaryngology
Wei et al. - 2024	United States	Answering head and neck cancer questions: An assessment of ChatGPT responses.	Am J Otolaryngol	ChatGPT 4.0	Otolaryngology
Willms et al. - 2024	Canada	Exploring the Feasibility of Using ChatGPT to Create Just-in-Time Adaptive Physical Activity mHealth Intervention Content: Case Study.	JMIR Med Educ	Chatbot based on ChatGPT 3.0	General Medicine
Woo et al. - 2024	United States	Evaluation of GPT-4 ability to identify and generate patient instructions for actionable incidental radiology findings.	J Am Med Inform Assoc	ChatGPT 4.0	Radiology
Wrenn et al. - 2024	United States	Evaluating ChatGPT's Ability to Answer Common Patient Questions Regarding Hip Fracture.	J Am Acad Orthop Surg	ChatGPT	Orthopedic Surgery
Wright et al. - 2024	United States	Is ChatGPT a trusted source of information for total hip and knee arthroplasty patients?	Bone Jt Open	ChatGPT	Orthopedic Surgery
Wu et al. - 2024	China	Evaluating the performance of the language model ChatGPT in responding to common questions of people with epilepsy.	Epilepsy Behav	ChatGPT	Neurology
Wu et al. - 2024	United States	Patients with floaters: Answers from virtual assistants and large language models.	Digit Health	ChatGPT 3.5, Google BARD, Google Assistant, and Alexa	Ophtalmology
Xue et al. - 2024	China	Quality and Dependability of ChatGPT and DingXiangYuan Forums for Remote Orthopedic Consultations: Comparative Analysis.	J Med Internet Res	ChatGPT 4.0	Orthopedic Surgery
Yalla et al. - 2024	United States	Performance of Artificial Intelligence Chatbots on Glaucoma Questions Adapted From Patient Brochures.	Cureus	ChatGPT 4.0, Google BARD, and Microsoft Bing Chat	Ophtalmology
Yan et al. - 2024	China	Assessment of the Reliability and Clinical Applicability of ChatGPT's Responses to Patients' Common Queries About Rosacea.	Patient Prefer Adherence	ChatGPT 3.5	Dermatology
Yan et al. - 2024	China	Walking forward or on hold: Could the ChatGPT be applied for seeking health information in neurosurgical settings?	Ibrain	ChatGPT 3.5 and ChatGPT 4.0	Neurological Surgery
Ye et al. - 2024	Canada	Doctor Versus Artificial Intelligence: Patient and Physician Evaluation of Large Language Model Responses to Rheumatology Patient Questions in a Cross-Sectional Study.	Arthritis Rheumatol	ChatGPT 4.0	Rheumatology
Yeo et al. - 2023	United States	Assessing the performance of ChatGPT in answering questions regarding cirrhosis and hepatocellular carcinoma.	Clin Mol Hepatol	ChatGPT 3.5	Gastroenterology/Hepatology
Yılmaz et al. - 2024	Turkey	Talking technology: exploring chatbots as a tool for cataract patient education.	Clin Exp Optom	ChatGPT 3.5, Google BARD and Microsoft Bing Chat	Ophtalmology
Yüce et al. - 2024	Turkey	The Potential of ChatGPT for High-Quality Information in Patient Education for Sports Surgery.	Cureus	ChatGPT 4.0	Orthopedic Surgery
Yun et al. - 2023	Republic of Korea	A comprehensive evaluation of ChatGPT consultation quality for augmentation mammoplasty: A comparative analysis between plastic surgeons and laypersons.	Int J Med Inform	ChatGPT 4.0	Plastic Surgery
Zaleski et al. - 2024	United States	Comprehensiveness, Accuracy, and Readability of Exercise Recommendations Provided by an AI-Based Chatbot: Mixed Methods Study.	JMIR Med Educ	ChatGPT	General Medicine
Zalzal et al. - 2024	United States	Can ChatGPT help patients answer their otolaryngology questions?	Laryngoscope Investig Otolaryngol	ChatGPT 3.5	Otolaryngology
Zaretsky et al. - 2024	United States	Generative Artificial Intelligence to Transform Inpatient Discharge Summaries to Patient-Friendly Language and Format.	JAMA Netw Open	ChatGPT 4.0	General Medicine
Zhang et al. - 2024	Singapore	Evaluating the accuracy and relevance of ChatGPT responses to frequently asked questions regarding total knee replacement.	Knee Surg Relat Res	ChatGPT 3.5	Orthopedic Surgery
Zhang et al. - 2024	China	Performance of large language models on benign prostatic hyperplasia frequently asked questions.	Prostate	ChatGPT 3.5, ChatGPT 4, and Microsoft Bing Chat (New Bing)	Urology
